# Supplementary material for: The Burden of Ventricular Premature Complex Is Associated With Cardiovascular Mortality
Source: PubMed Central journal article supplement (PMC8850345; doi:10.3389/fcvm.2021.797976), 2022-02-03
Supplement: Data_Sheet_1.pdf [file Data_Sheet_1.pdf]

## Supplementary Material

### 1.1 Supplementary Tables

**Table S1. Demographic and clinical characteristics of overall study cohort, event group, and event-free group regarding to all-cause mortality**

|                                          | Overall<br>(N = 19527)            | Event group<br>(N = 1471)         | Event-free group<br>(N = 18056)   | P value      |
|------------------------------------------|-----------------------------------|-----------------------------------|-----------------------------------|--------------|
|                                          | Median (IQR) /<br>N (%) / Mean±SD | Median (IQR) /<br>N (%) / Mean±SD | Median (IQR) /<br>N (%) / Mean±SD |              |
| Age (y)                                  | 59.6 ± 17.5                       | 73.1 ± 12.5                       | 58.5 ± 17.4                       | < .001       |
| Male                                     | 9221 (47.2)                       | 865 (58.8)                        | 8356 (46.3)                       | < .001       |
| Follow-up days                           | 985 (549 – 1429)                  | 860 (483 – 1255)                  | 995.6 (555 – 1433)                | < .001       |
| APC                                      | 18.0 (3.0 – 117.0)                | 77.0 (9.0 – 654.0)                | 16.0 (3.0 – 98.0)                 | < .001       |
| VPC                                      | 8.0 (1.0 – 155.0)                 | 37.0 (3.0 – 434.0)                | 8.0 (1.0 – 138.0)                 | < .001       |
| HTN                                      | 9620 (49.3)                       | 1056 (71.8)                       | 8564 (47.4)                       | < .001       |
| DM                                       | 4367 (22.4)                       | 607 (41.3)                        | 3760 (20.8)                       | < .001       |
| Dyslipidemia                             | 8981 (46.0)                       | 706 (48.0)                        | 8275 (45.8)                       | 0.115        |
| HF                                       | 2424 (12.4)                       | 481 (32.7)                        | 1943 (10.8)                       | < .001       |
| AMI                                      | 749 (3.8)                         | 116 (7.9)                         | 633 (3.5)                         | < .001       |
| CAD                                      | 2335 (12.0)                       | 333 (22.6)                        | 2002 (11.1)                       | < .001       |
| PAD                                      | 431 (2.2)                         | 80 (5.4)                          | 351 (1.9)                         | < .001       |
| AF                                       | 3497 (17.9)                       | 544 (37.0)                        | 2953 (16.4)                       | < .001       |
| Stroke                                   | 1697 (8.7)                        | 257 (17.5)                        | 1440 (8.0)                        | < .001       |
| CKD                                      | 3866 (19.8)                       | 760 (51.7)                        | 3106 (17.2)                       | < .001       |
| CVD                                      | 2595 (13.3)                       | 372 (25.3)                        | 2223 (12.3)                       | < .001       |
| Aspirin                                  | 4092 (21.0)                       | 378 (25.7)                        | 3714 (20.6)                       | < .001       |
| P <sub>2</sub> Y <sub>12</sub> inhibitor | 1676 (8.6)                        | 217 (14.8)                        | 1459 (8.1)                        | < .001       |
| ACEi/ARB                                 | 3308 (16.9)                       | 322 (21.9)                        | 2986 (16.5)                       | < .001       |
| Statin                                   | 3612 (18.5)                       | 262 (17.8)                        | 3350 (18.6)                       | 0.503        |
| Class Ia                                 | 8 (0.04)                          | 3 (0.2)                           | 5 (0.03)                          | <b>0.018</b> |
| Class Ib AAD                             | 993 (5.3)                         | 99 (6.7)                          | 884 (5.2)                         | <b>0.011</b> |
| Class Ic AAD                             | 376 (1.9)                         | 22 (1.5)                          | 354 (2.0)                         | 0.250        |
| Class III AAD                            | 1256 (6.4)                        | 202 (13.7)                        | 1054 (5.8)                        | < .001       |
| Beta blocker                             | 4123 (21.1)                       | 261 (17.7)                        | 3862 (21.4)                       | <b>0.001</b> |
| Non-DHP CCB                              | 1046 (5.4)                        | 126 (8.6)                         | 920 (5.1)                         | < .001       |

AAD, antiarrhythmic drug; ACEi/ARB, angiotensin-converting enzyme inhibitor/angiotensin receptor blocker; AF, atrial fibrillation; APC, atrial premature complex; AMI, acute myocardial infarction; CAD, coronary artery disease; CKD, chronic kidney disease; CV death, cardiovascular death ;CVD, cardiovascular disease (including coronary artery disease, stroke, and peripheral artery

disease); DM, diabetes mellitus; HF, heart failure; HTN, hypertension; IQR, interquartile range; non-DHP CCB, non-dihydropyridine calcium channel blocker; PAD, peripheral artery disease; VPC, ventricular premature complex. VT, ventricular tachycardia. Age was shown as Mean  $\pm$  SD. Follow-up days, VPC count, VPC burden, APC count were shown as Median (IQR). The other variables were shown as N (%).

**Table S2. Demographic and clinical characteristics of overall study cohort, event group, and event-free group regarding to cardiovascular death**

|                                          | Overall<br>(N = 19527)            | Event group<br>(N = 300)          | Event-free group<br>(N = 19227)   | P value      |
|------------------------------------------|-----------------------------------|-----------------------------------|-----------------------------------|--------------|
|                                          | Median (IQR) /<br>N (%) / Mean±SD | Median (IQR) /<br>N (%) / Mean±SD | Median (IQR) /<br>N (%) / Mean±SD |              |
| Age (y)                                  | 59.6 ± 17.5                       | 73.3 ± 13.2                       | 59.4 ± 17.5                       | < .001       |
| Male                                     | 9221 (47.2)                       | 179 (59.7)                        | 9042 (47.0)                       | < .001       |
| Follow-up days                           | 985 (549 – 1429)                  | 850 (479 – 1327)                  | 987 (551 – 1429)                  | <b>0.002</b> |
| APC                                      | 18 (3 – 117)                      | 58 (0 – 681)                      | 18 (3 – 113)                      | < .001       |
| VPC                                      | 8 (1 – 155)                       | 227 (11 – 1401)                   | 8 (1 – 146)                       | < .001       |
| HTN                                      | 9620 (49.3)                       | 234 (78.0)                        | 9386 (48.8)                       | < .001       |
| DM                                       | 4367 (22.4)                       | 132 (44.0)                        | 4235 (22.0)                       | < .001       |
| Dyslipidemia                             | 8981 (46.0)                       | 175 (58.3)                        | 8806 (45.8)                       | < .001       |
| HF                                       | 2424 (12.4)                       | 160 (53.3)                        | 2264 (11.8)                       | < .001       |
| AMI                                      | 749 (3.8)                         | 47 (15.7)                         | 702 (3.7)                         | < .001       |
| CAD                                      | 2335 (12.0)                       | 104 (34.7)                        | 2231 (11.6)                       | < .001       |
| PAD                                      | 431 (2.2)                         | 24 (8.0)                          | 407 (2.1)                         | < .001       |
| AF                                       | 3497 (17.9)                       | 152 (50.7)                        | 3345 (17.4)                       | < .001       |
| Stroke                                   | 1697 (8.7)                        | 57 (19.0)                         | 1640 (8.5)                        | < .001       |
| CKD                                      | 3866 (19.8)                       | 194 (64.7)                        | 3672 (19.1)                       | < .001       |
| CVD                                      | 2595 (13.3)                       | 113 (37.7)                        | 2482 (12.9)                       | < .001       |
| Aspirin                                  | 4092 (21.0)                       | 109 (36.3)                        | 3983 (20.7)                       | < .001       |
| P <sub>2</sub> Y <sub>12</sub> inhibitor | 1676 (8.6)                        | 67 (22.3)                         | 1609 (8.4)                        | < .001       |
| ACEi/ARB                                 | 3308 (16.9)                       | 111 (37.0)                        | 3197 (16.6)                       | < .001       |
| Statin                                   | 3612 (18.5)                       | 74 (24.7)                         | 3538 (18.4)                       | <b>0.007</b> |
| Class Ia AAD                             | 8 (0.04)                          | 0 (0)                             | 8 (0.04)                          | 1.000        |
| Class Ib AAD                             | 993 (5.3)                         | 42 (14.0)                         | 951 (5.1)                         | < .001       |
| Class Ic AAD                             | 376 (1.9)                         | 3 (1.0)                           | 373 (1.9)                         | 0.335        |
| Class III AAD                            | 1256 (6.4)                        | 68 (22.7)                         | 1188 (6.2)                        | < .001       |
| Beta blocker                             | 4123 (21.1)                       | 61 (20.3)                         | 4062 (21.1)                       | 0.793        |
| Non-DHP CCB                              | 1046 (5.4)                        | 17 (5.7)                          | 1029 (5.4)                        | 0.912        |

AAD, antiarrhythmic drug; ACEi/ARB, angiotensin-converting enzyme inhibitor/angiotensin receptor blocker; AF, atrial fibrillation; APC, atrial premature complex; AMI, acute myocardial infarction; CAD, coronary artery disease; CKD, chronic kidney disease; CV death, cardiovascular death; CVD, cardiovascular disease (including coronary artery disease, stroke, and peripheral artery disease); DM, diabetes mellitus; HF, heart failure; HTN, hypertension; IQR, interquartile range; non-DHP CCB, non-dihydropyridine calcium channel blocker; PAD, peripheral artery disease; VPC, ventricular premature complex. VT, ventricular tachycardia. Age was shown as Mean ± SD. Follow-

up days, VPC count, VPC burden, APC count were shown as Median (IQR). The other variables were shown as N (%).

**Table S3. Univariate and multivariable Cox regression model for cardiovascular mortality.**

|                          | <b>Crude HR<br/>(95% CI)</b> | <b>P value</b> | <b>Adjust HR<br/>(95% CI)</b> | <b>P value</b>   |
|--------------------------|------------------------------|----------------|-------------------------------|------------------|
| VPC burden               |                              |                |                               |                  |
| Low                      | Reference                    |                | Reference                     |                  |
| Moderate                 | 2.60 (1.95-3.45)             | <0.001         | 1.47 (1.09-1.98)              | <b>0.012</b>     |
| High                     | 2.87 (1.89-4.34)             | <0.001         | 1.68 (1.07-2.63)              | <b>0.023</b>     |
| Clinical characteristics |                              |                |                               |                  |
| Age                      | 1.06 (1.05-1.07)             | <0.001         | 1.04 (1.03-1.05)              | <b>&lt;0.001</b> |
| Male                     | 1.67 (1.33-2.11)             | <0.001         | 1.22 (0.96-1.54)              | 0.103            |
| DM                       | 2.63 (2.10-3.31)             | <0.001         | 1.19 (0.93-1.53)              | 0.176            |
| Dyslipidemia             | 1.55 (1.23-1.94)             | <0.001         | 0.86 (0.67-1.11)              | 0.245            |
| HTN                      | 3.31 (2.52-4.35)             | <0.001         | 1.06 (0.78-1.43)              | 0.716            |
| CKD                      | 7.19 (5.67-9.12)             | <0.001         | 2.84 (2.18-3.70)              | <b>&lt;0.001</b> |
| HF                       | 8.30 (6.61-10.41)            | <0.001         | 3.89 (3.04-4.98)              | <b>&lt;0.001</b> |
| CVD                      | 3.98 (3.15-5.03)             | <0.001         | 1.57 (1.20-2.06)              | <b>0.001</b>     |
| VT count                 | 1.001 (1.000-1.001)          | 0.003          | 1.00 (1.00-1.00)              | 0.989            |
| Medication               |                              |                |                               |                  |
| Antiplatelet             | 2.58 (2.06-3.24)             | <0.001         | 1.10 (0.85-1.42)              | 0.470            |
| AAD                      | 3.29 (2.59-4.19)             | <0.001         | 1.61 (1.24-2.09)              | <b>&lt;0.001</b> |
| Beta blocker             | 0.89 (0.67-1.18)             | 0.422          | 0.90 (0.68-1.20)              | 0.471            |

AAD, antiarrhythmic drug; CKD, chronic kidney disease; CVD, cardiovascular disease (including coronary artery disease, stroke, and peripheral artery disease); DM, diabetes mellitus; HF, heart failure; HTN, hypertension; IQR, interquartile range; non-DHP CCB, non-dihydropyridine calcium channel blocker; PAD, peripheral artery disease; VPC, ventricular premature complex. VT, ventricular tachycardia.
